# Supplementary material for: A new polymorph of the common coformer isonicotinamide
Source: Royal Society of Chemistry journal article supplement (doi:10.1039/c8ce01588k), 2018-12-20
Supplement: c8ce01588k1.pdf [file c8ce01588k1.pdf]

## **ESI material for the manuscript:**

### **A new polymorph of the common coformer isonicotinamide**

Alexios I. Vicatos and Mino R. Caira

Table S1: The conditions limiting possible reflections for the crystal of polymorph 6.

| Number | Conditions limiting possible reflections*   | Deduction                                  |
|--------|---------------------------------------------|--------------------------------------------|
| 1      | hkl: none                                   | Primitive lattice                          |
| 2      | 0kl: $k = 2n$                               | b-glide plane perpendicular to the a-axis  |
| 3      | h0l: $l = 2n$                               | c-glide plane perpendicular to the b-axis  |
| 4      | hk0: none                                   | no glide plane perpendicular to the c-axis |
| 5      | h00: $h = 2n$ ( <i>apparent initially</i> ) | Screw axis parallel to the a-axis          |
| 6      | 0k0: $k = 2n$                               | Redundant condition (from 2 above)         |
| 7      | 00l: $l = 2n$                               | Redundant condition (from 3 above)         |

\*The conditions listed above refer to the original setting of the crystal unit cell, namely that with  $a = 7.9929(9)$ ,  $b = 9.888(1)$ ,  $c = 15.162(2)$  Å, corresponding to the space group setting  $Pbc2_1$ . Transformation to the standard setting,  $Pca2_1$  (No. 29), required application of the matrix  $\begin{pmatrix} 0 & 1 & 0 \\ 1 & 0 & 0 \\ 0 & 0 & -1 \end{pmatrix}$  to the original unit cell vectors.

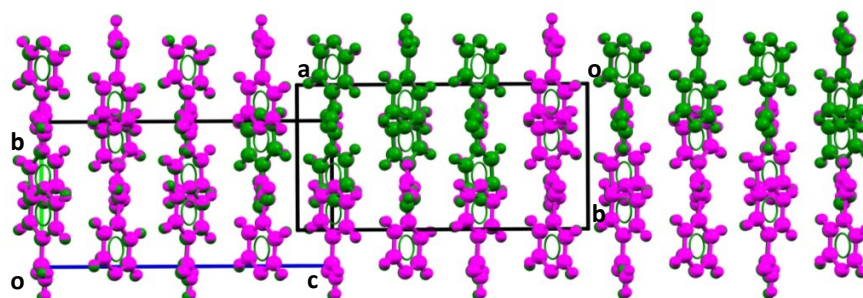

Figure S1: The molecular overlay of polymorph 2 (green) and polymorph 6 (pink), derived from Figure 5 by a 90° rotation around the c-axis of the orthorhombic polymorph.

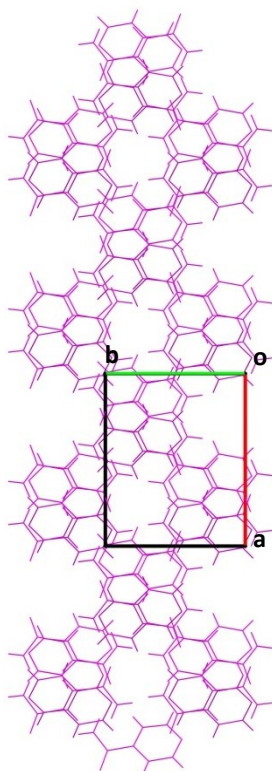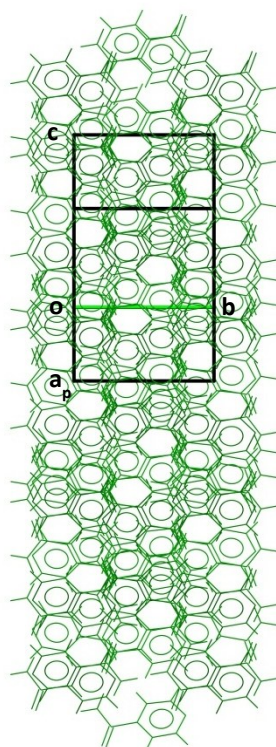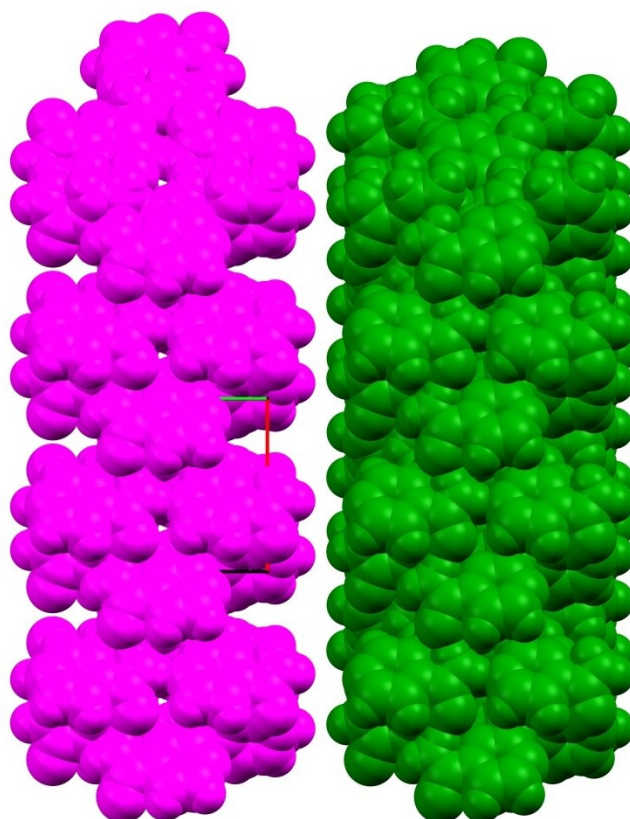

Figure S2a: A wireframe representation of the molecular overlay of polymorph 2 (green) and polymorph 6 (pink), derived from Figure 5 by a 90° rotation around the a-axis of the orthorhombic polymorph.

Figure S2b: A space-filling representation of the molecular overlay shown in Figure S2a.

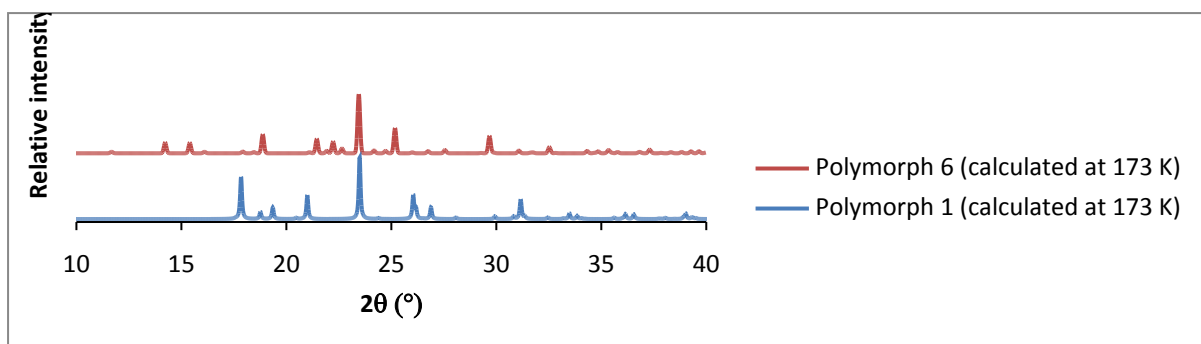

Figure S3a: The calculated PXRD patterns of polymorph 1 and 6.

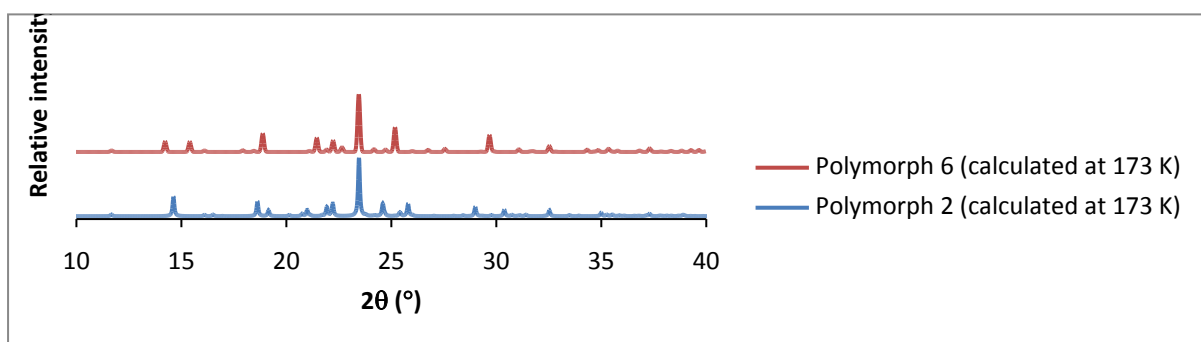

Figure S3b: The calculated PXRD patterns of polymorph 2 and 6.

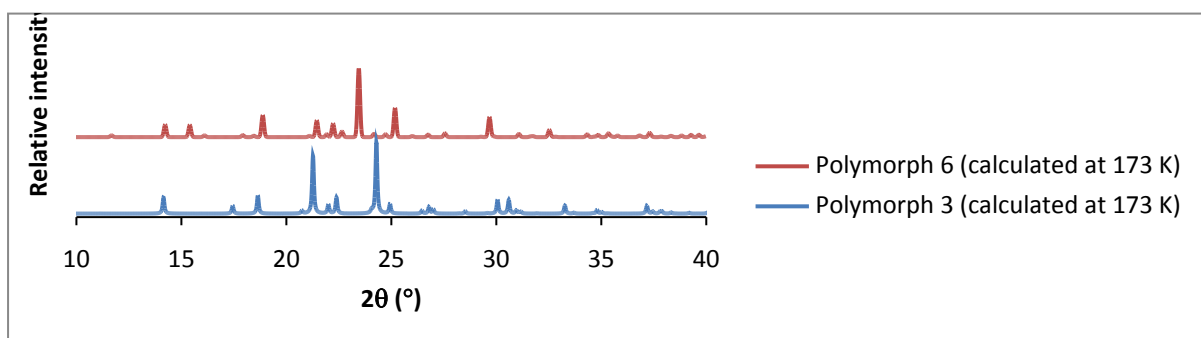

Figure S3c: The calculated PXRD patterns of polymorph 3 and 6.

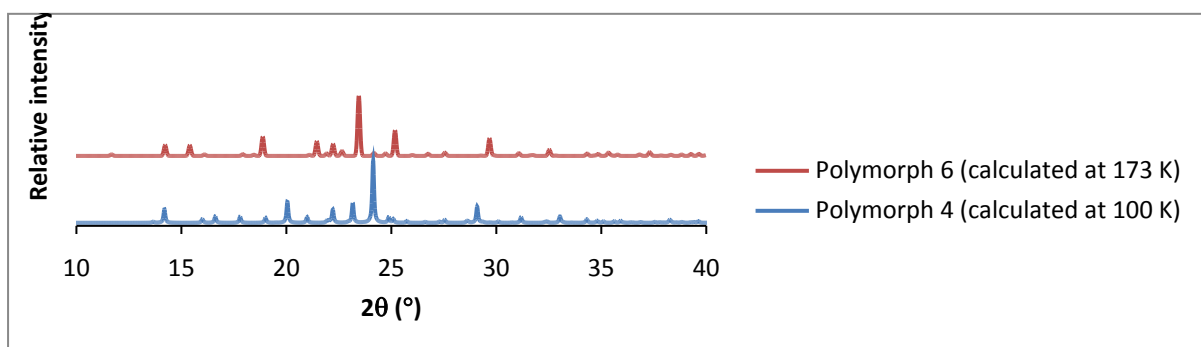

Figure S3d: The calculated PXRD patterns of polymorph 4 and 6.

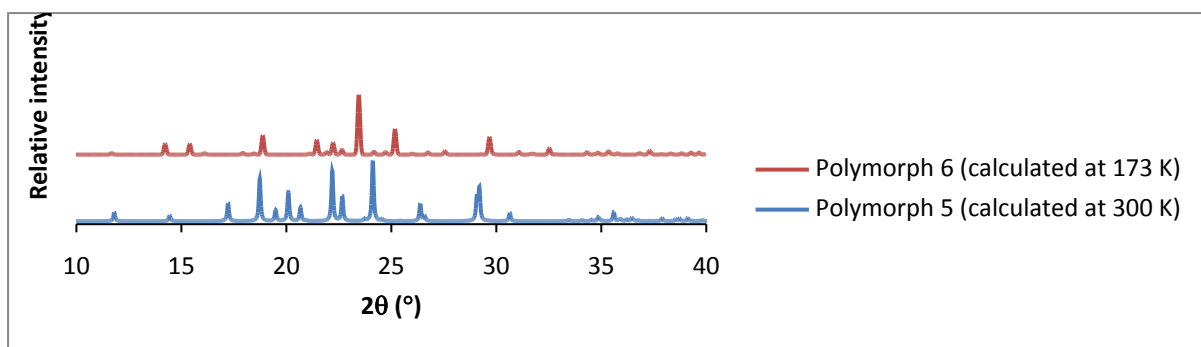

Figure S3e: The calculated PXRD patterns of polymorph 5 and 6.

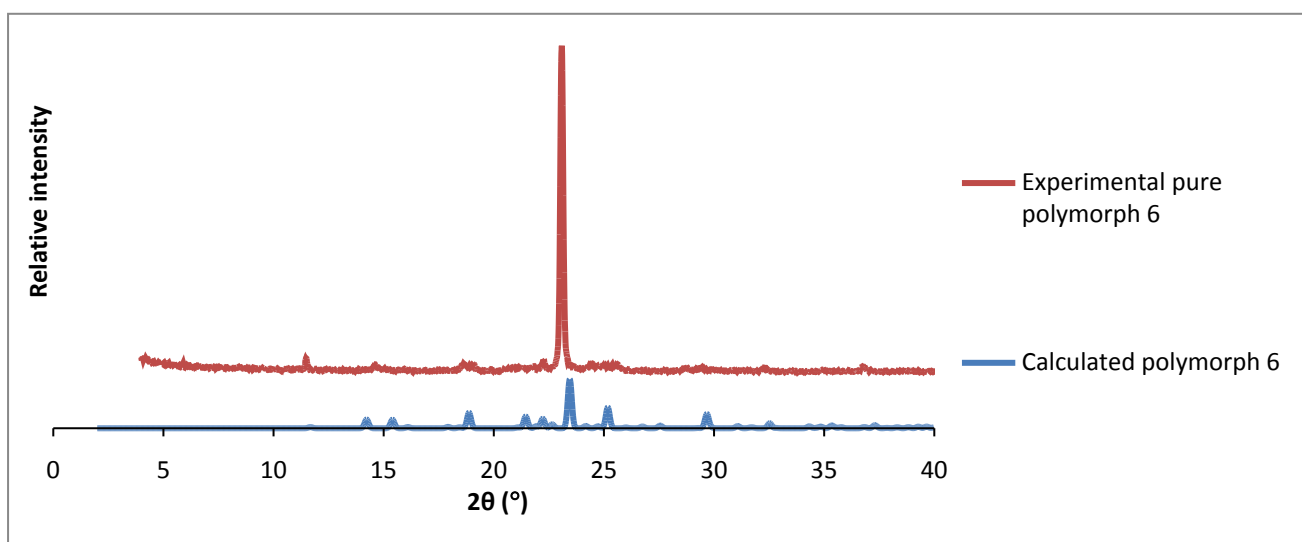

Figure S4a: The experimental PXRD pattern of pure polymorph 6 and the calculated PXRD pattern of polymorph 6.

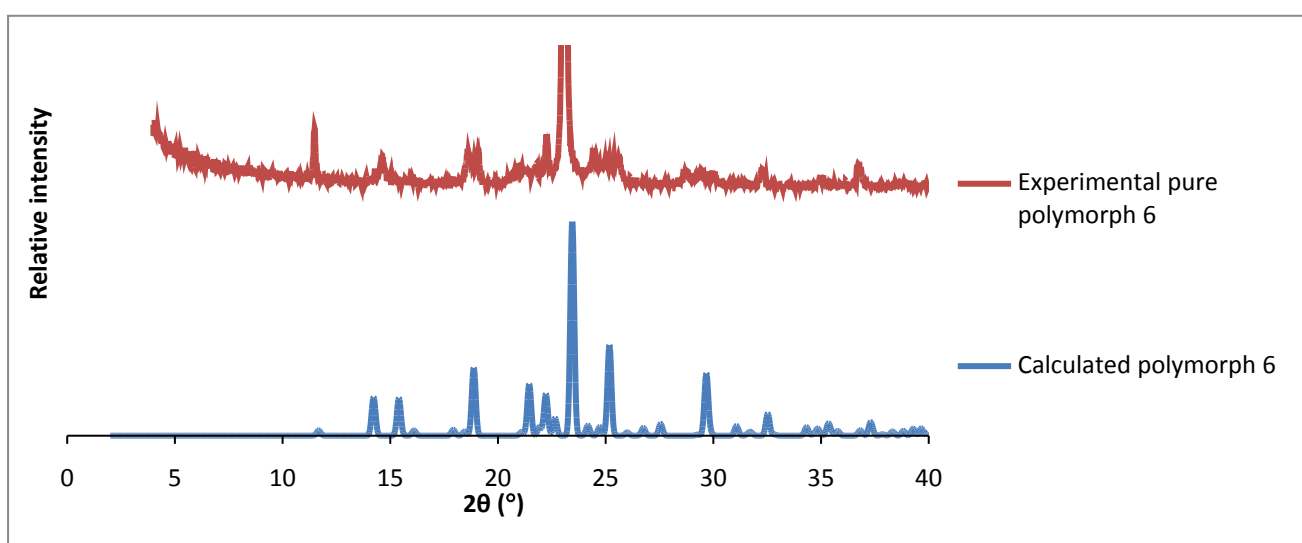

Figure S4b: Intensity-enhanced representations of the PXRD patterns shown in Figure S3a.

Figure S5: A series of HSM micrographs which display the thermal progression of polymorphs 1, 2, 3, 4 and 6 of isonicotinamide from 27.5 °C – 161.0 °C.

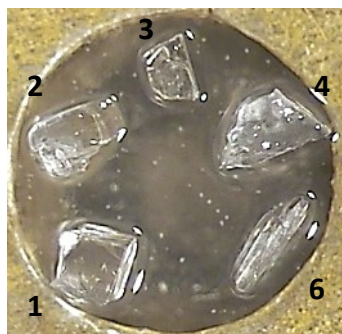

Image 1: The initial appearance of the polymorphs at 27.5 °C.

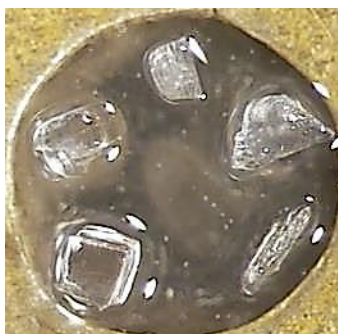

Image 2: At 122.8 °C the onset of opacity occurred within polymorph 3.

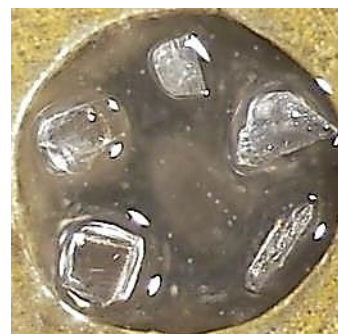

Image 3: At 128.9 °C the onset of the melt occurred for polymorph 6.

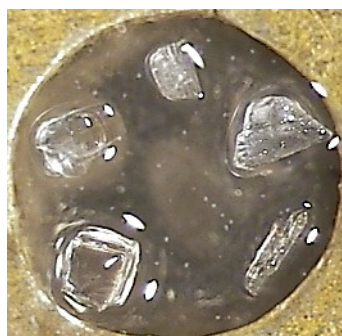

Image 4: At 132.1 °C the remaining polymorphs began to melt.

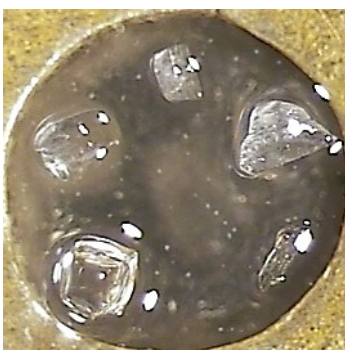

Image 5: At 141.9 °C the onset of opacity occurred within polymorph 4.

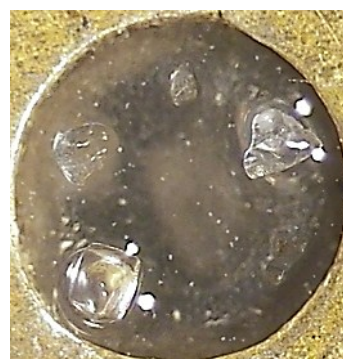

Image 6: At 151.3 °C the melting rate increased and polymorph 6 completely melted.

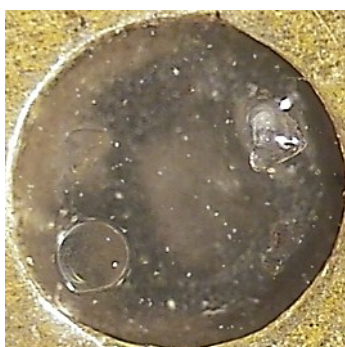

Image 7: At 155.1 °C polymorphs 1, 2 and 3 had melted, while the melting rate of polymorph 4 decreased significantly.

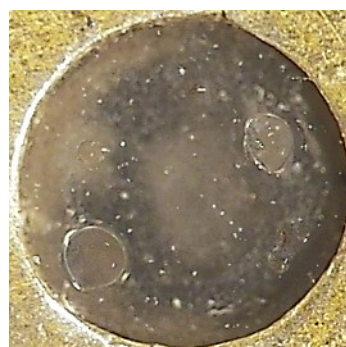

Image 8: At 161.0 °C all the crystals had fully melted.



Table S2: The results from selected crystals of the recrystallization of isonicotinamide from acetone, acetonitrile and isopropanol.

| <b>Solvent</b> | <b>Product characteristics</b>                                     | <b>Method of analysis</b> | <b>Results</b>                                                                                                                                                               |
|----------------|--------------------------------------------------------------------|---------------------------|------------------------------------------------------------------------------------------------------------------------------------------------------------------------------|
| Acetone        | Large, rectangular, transparent crystals.                          | SCXRD                     | Polymorphs 6, 4 and 2 were found in approximately equal ratios by mass.                                                                                                      |
| Acetonitrile   | Medium to large, rectangular, transparent crystals.                | SCXRD                     | Polymorphs 6, 4, 2 were found in approximately equal ratios by mass.                                                                                                         |
| Isopropanol    | Medium-sized, transparent crystals in the shape of parallelograms. | SCXRD and PXRD            | A fair amount of single crystals of polymorph 6 was obtained (majority). However, a few of the other polymorphs (except for polymorph 5) were occasionally found (minority). |
